# Supplementary material
Source: PubMed Central journal article supplement (PMC4282609)

**Supplemental Figure 1 –Experimental design of mouse studies.** Two separate mouse experiments were performed to examine the effect of G-CSF on spermatogenic recovery after busulfan treatment. **(A)** In both experiments, Five-week old C57BL/6 males were treated with G-CSF or vehicle seven days (green triangles) and given one injection of DMSO or Busulfan on day 3. **(B)** In both experiments, animals were randomly assigned to three treatment groups: Control, Busulfan Only, and Busulfan + G-CSF. Shown is the specific treatment regimen for animals in each group and the number of animals per group. **(C)** Animals in Experiment 1 were euthanized 10 weeks after treatment and testis weight, testis histology and epididymal sperm counts were measured (Figure 1). **(D)** Animals in Experiment 2 were euthanized 24 hours following the last treatment (on day 8) and used for immunofluorescent analysis of the frequency of PLZF+ spermatogonia and their labeling indices with apoptotic measures (Figure 2).

**Supplemental Figure 2 – Gross tubule cross-section morphometry (Experiment 1).**

Automated image analysis using a custom Matlab program was used to measure gross morphometric characteristics of round seminiferous tubule cross-sections in testes from mice in Experiment 1 treated with busulfan ± G-CSF. Round seminiferous tubules were defined as having a shape factor of  $\geq 0.8$  (shape factor =  $4\pi \text{area} / \text{circumference}^2$ ), where a value closer to 1 is a more perfect circle. Morphometrics were reported for only seminiferous tubule cross-sections

containing complete spermatogenesis (**A, C, E, G, I**) or for all round tubule cross-sections (**B, D, F, H, J**). Shown are (**A-B**) equivalent diameter (equivalent diameter =  $\sqrt{(4\text{area}/\pi)}$  which provides the diameter of a circle with the equivalent area as the noted tubule cross-section, (**C-D**) major and minor axes (largest and smallest diameters), (**E-F**) area, (**G-H**) perimeter (circumference), and (**I-J**) shape factor. All values are average  $\pm$  SEM. Labels above bars signify statistically-significant differences between groups as determined by student's t-test. Pairwise t-test p-values for these data are shown in Supplemental Table 4.

**Supplemental Table 1 – Antibodies used in this study.**

| <b>Experiment(s)</b>                           | <b>Antigen</b>       | <b>Primary Antibody<br/>(dilution, cat#, vendor)</b>                                         | <b>Secondary Antibody<br/>(dilution, cat#, vendor)</b>                                      |
|------------------------------------------------|----------------------|----------------------------------------------------------------------------------------------|---------------------------------------------------------------------------------------------|
| Testis<br>Immunofluorescence<br>(Experiment 2) | PLZF                 | goat anti-PLZF IgG<br>(1ug/ml, AF2944, R&D<br>Systems, Minneapolis, MN)                      | donkey anti-goat<br>AlexaFluor568 IgG (1:800,<br>A-11057, Life Technologies)                |
| Testis<br>Immunofluorescence<br>Experiment 2)  | Cleaved<br>Caspase 3 | rabbit anti-cleaved Caspase<br>3 IgG (10ug/ml, ab2302,<br>Abcam, Cambridge, MA)              | goat anti-rabbit<br>AlexaFluor488 IgG (1:800,<br>A-11034, Life Technologies)                |
| Western blot                                   | CSF3R                | Sheep anti-CSF3R IgG<br>(1:1000, AF6039, R&D<br>Systems)                                     | donkey anti-sheep IgG<br>(1:10,000; sc-2916, Santa<br>Cruz Biotechnology)                   |
| Flow cytometry                                 | CSF3R                | mouse anti-CSF3R IgG2b, $\kappa$<br>(3 $\mu$ g/10 <sup>6</sup> cells; ab1947,<br>Abcam)      | APC-conjugated goat anti-<br>mouse IgG (0.25ug/10 <sup>6</sup> cells;<br>405308, Biolegend) |
| Flow cytometry                                 | Isotype<br>control   | Ms IgG2b, $\kappa$ (3 $\mu$ g/10 <sup>6</sup> cells;<br>400301, Biolegend, San<br>Diego, CA) | APC-conjugated goat anti-<br>mouse IgG (0.25ug/10 <sup>6</sup> cells;<br>405308, Biolegend) |
| Immunofluorescence<br>in Thy1+ sg cultures     | CSF3R                | Sheep anti-CSF3R IgG<br>(2ug/ml, AF6039, R&D<br>Systems)                                     | donkey anti-sheep<br>AlexaFluor488 IgG (1:800;<br>A-11015, Life Technologies)               |
| Immunofluorescence<br>in Thy1+ sg cultures     | SALL4                | rabbit anti-SALL4 IgG<br>(1.6ug/ml, ab29112,<br>Abcam)                                       | donkey anti-rabbit<br>AlexaFluor568 IgG (1:800;<br>A-10042, Life Technologies)              |

**Supplemental Table 2 – Oligodeoxynucleotide primers.**

| <b>Target gene</b> | <b>Method</b> | <b>Forward primer (5'- 3')</b> | <b>Reverse Primer (5'- 3')</b> | <b>Amplicon (bp)</b> | <b>Location</b> |
|--------------------|---------------|--------------------------------|--------------------------------|----------------------|-----------------|
| <i>Csf3r</i>       | RT-PCR        | GTACTCTTGTCCACTACCTGT          | CAAGATACAAGGACCCCCAA           | 630bp                | Exons 15-17     |
| <i>Gapdh</i>       | RT-PCR        | ATCACCATCTTCCAGGAGCGAGA        | GATGGCATGGACTGTGGTCATGA        | 324bp                | Exons 3-5       |
| <i>Csf3r</i>       | qRT-PCR*      | GCGTCCAACCTCCTGGATCA           | GAGGTGCATGAGGCAGGATA           | 83bp                 | Exons 4-5       |
| <i>Dazl</i>        | qRT-PCR*      | CTTACATGCAGCCTCCAACC           | GTGATGACCTGAACTGGTGAAC         | 91bp                 | Exons 6-7       |
| <i>Ddx4</i>        | qRT-PCR*      | TGATGGCTTGTGCTCAAACA           | CCCGCATCATATGAGCCAAA           | 75bp                 | Exons 14-15     |
| <i>Foxo1</i>       | qRT-PCR*      | GAAGAGCGTGCCCTACTTCA           | GGACAGATTGTGGCGAATTGAA         | 82bp                 | Exons 1-2       |
| <i>Gfra1</i>       | qRT-PCR*      | CCAATGTATCGGGCAGTACACA         | CCAGCGAGACCATCCTTTCC           | 67bp                 | Exons 9-10      |
| <i>Sall4</i>       | qRT-PCR*      | TTCACCACGAAAGGCAACC            | TCTATGGCCAGCTTCCTTCC           | 89bp                 | Exons 2-3       |
| <i>Sohlh1</i>      | qRT-PCR*      | GCAAGCCAGACTCCGGTATA           | TGTATCCAGCATCCCAAAGCA          | 80bp                 | Exons 4-5       |
| <i>Sohlh2</i>      | qRT-PCR*      | GATCAGCACTGGGGAGCTA            | TCTTGTGGCATCTCCAACCA           | 76bp                 | Exons 1-2       |
| <i>Zbtb16</i>      | qRT-PCR*      | TGGCAAGAAGTTCAGCCTCA           | GTGGCAGAGTTTGCCTCAA            | 88bp                 | Exons 6-7       |
| <i>Gdnf</i>        | qRT-PCR*      | CCCGCTGAAGACCACTCC             | CTGGTCAGGATAATCTTCAGGCATA      | 87bp                 | Exons 2-3       |
| <i>Hsd3b1</i>      | qRT-PCR*      | TCCCAGGCAGACCATCCTA            | CTGGCACACTTGCTTGAACA           | 80bp                 | Exons 4-5       |
| <i>Actb</i>        | qRT-PCR*      | CCCTAAGGCCAACCGTGAAA           | AGCCTGGATGGCTACGTACA           | 82bp                 | Exons 3-4       |
| <i>Gapdh</i>       | qRT-PCR*      | AGACGGCCGCATCTTCTT             | TTCACACCGACCTTCACCAT           | 68bp                 | Exons 1-2       |
| <i>Rpl7</i>        | qRT-PCR*      | CAAAGCTGGCCTTTGTCATCA          | AAGACGAAGGAGCTGCAGAA           | 83bp                 | Exons 3-4       |

\*Single-cell qRT-PCR

**Supplemental Table 3 – Tubule cross-section counting statistics from mice 10 weeks after busulfan ± G-CSF treatment (Experiment1).**

| Treatment Group  | Animal  | Category (# round tubule cross-sections) |           |               |          |         |
|------------------|---------|------------------------------------------|-----------|---------------|----------|---------|
|                  |         | Complete                                 | Round Std | Pachytene Sct | Empty/Sg | All     |
| Control          | 1       | 1508                                     | 0         | 0             | 1        | 1509    |
|                  | 2       | 287                                      | 0         | 0             | 0        | 287     |
|                  | 3       | 533                                      | 22        | 9             | 0        | 564     |
| Busulfan Only    | 1       | 8                                        | 0         | 0             | 597      | 605     |
|                  | 2       | 26                                       | 9         | 8             | 468      | 511     |
|                  | 3       | 91                                       | 21        | 16            | 569      | 697     |
| Busulfan + G-CSF | 1       | 102                                      | 17        | 38            | 681      | 838     |
|                  | 2       | 238                                      | 43        | 21            | 660      | 962     |
|                  | 3       | 117                                      | 23        | 12            | 549      | 701     |
|                  | 4       | 98                                       | 15        | 23            | 545      | 681     |
| Control          | Sum     | 2328                                     | 22        | 9             | 1        | 2360    |
| Busulfan Only    | Sum     | 125                                      | 30        | 24            | 1634     | 1813    |
| Busulfan + GCSF  | Sum     | 555                                      | 98        | 94            | 2435     | 3182    |
| Control          | Avg±SEM | 776±457                                  | 7±9       | 3±4           | 0.3±0.4  | 787±453 |
| Busulfan Only    | Avg±SEM | 42±31                                    | 10±7      | 8±6           | 545±48   | 604±66  |
| Busulfan + GCSF  | Avg±SEM | 139±39                                   | 25±7      | 24±6          | 609±41   | 796±76  |

**Supplemental Table 4 – P-values of pairwise t-test comparisons of tubule morphometrics (Experiment 1).**

| Tubule type                         | Comparison groups                | Measurement         |             |             |             |             |              |
|-------------------------------------|----------------------------------|---------------------|-------------|-------------|-------------|-------------|--------------|
|                                     |                                  | Equivalent diameter | Perimeter   | Major Axis  | Minor Axis  | Area        | Shape Factor |
| All round                           | Control to Busulfan Only         | 8.8818E-173         | 1.8503E-176 | 1.6955E-146 | 7.1083E-186 | 3.8381E-225 | 0.769411277  |
|                                     | Control to Busulfan + GCSF       | 0*                  | 0*          | 5.0311E-260 | 0*          | 0*          | 0.025741627  |
|                                     | Busulfan Only to Busulfan + GCSF | 7.08151E-08         | 1.4229E-07  | 4.68496E-05 | 6.74707E-10 | 3.01461E-07 | 0.185102919  |
| Round with complete spermatogenesis | Control to Busulfan Only         | 8.51959E-59         | 6.45497E-57 | 2.76657E-36 | 4.3319E-79  | 1.38328E-70 | 4.01479E-07  |
|                                     | Control to Busulfan + GCSF       | 4.2078E-147         | 4.3913E-143 | 1.51448E-94 | 1.6467E-170 | 8.4803E-169 | 8.02502E-15  |
|                                     | Busulfan Only to Busulfan + GCSF | 0.405229249         | 0.407494917 | 0.602036078 | 0.003678421 | 0.34779885  | 0.741391701  |

\*Note: P-values of 0 are derived from rounding and reflect values very close to 0.

**Supplemental Table 5 – Quantification of PLZF+ spermatogonia and overlap with apoptotic measures from mice after busulfan ± G-CSF (Experiment 2).**

| Treatment Group  | Animal  | Combined PLZF+ (round only) |                        |                         | PLZF+ (round and non-round) |           |                      | PLZF+ (round and non-round) |          |                   |
|------------------|---------|-----------------------------|------------------------|-------------------------|-----------------------------|-----------|----------------------|-----------------------------|----------|-------------------|
|                  |         | Round tubule X-sections     | PLZF+ in Round tubules | PLZF+ per cross-section | Caspase3+                   | Caspase3- | Caspase3+ % of PLZF+ | TUNEL+                      | TUNEL-   | TUNEL+ % of PLZF+ |
| Control          | 1       | 549                         | 1747                   | 3.18                    | 3                           | 1581      | 0.19                 | 3                           | 1942     | 0.15              |
|                  | 2       | 224                         | 524                    | 2.34                    | 0                           | 930       | 0                    | 3                           | 1354     | 0.22              |
|                  | 3       | 232                         | 469                    | 2.02                    | 0                           | 1011      | 0                    | 1                           | 1064     | 0.09              |
|                  | 4       | 197                         | 388                    | 1.97                    | 0                           | 608       | 0                    | 0                           | 1030     | 0                 |
|                  | 5       | 173                         | 388                    | 2.24                    | 0                           | 628       | 0                    | 5                           | 857      | 0.58              |
|                  | 6       | 231                         | 559                    | 2.42                    | 0                           | 646       | 0                    | 0                           | 923      | 0                 |
|                  | 7       | 143                         | 385                    | 2.69                    | 0                           | 542       | 0                    | 0                           | 1260     | 0                 |
|                  | 8       | 227                         | 545                    | 2.4                     | 0                           | 543       | 0                    | 0                           | 931      | 0                 |
| Busulfan Only    | 1       | 107                         | 62                     | 0.58                    | 6                           | 321       | 1.83                 | 4                           | 228      | 1.72              |
|                  | 2       | 175                         | 77                     | 0.44                    | 2                           | 258       | 0.77                 | 7                           | 230      | 2.95              |
|                  | 3       | 254                         | 114                    | 0.45                    | 8                           | 222       | 3.48                 | 2                           | 249      | 0.80              |
|                  | 4       | 269                         | 68                     | 0.25                    | 4                           | 75        | 5.06                 | 9                           | 112      | 7.43              |
|                  | 5       | 203                         | 69                     | 0.34                    | 3                           | 151       | 1.95                 | 0                           | 203      | 0                 |
|                  | 6       | 180                         | 63                     | 0.35                    | 6                           | 107       | 5.31                 | 4                           | 157      | 2.48              |
|                  | 7       | 160                         | 80                     | 0.50                    | 2                           | 112       | 1.75                 | 2                           | 171      | 1.16              |
|                  | 8       | 550                         | 137                    | 0.25                    | 2                           | 104       | 1.89                 | 0                           | 118      | 0                 |
|                  | 9       | 545                         | 133                    | 0.24                    | 7                           | 93        | 7.00                 | 2                           | 126      | 1.56              |
| Busulfan + G-CSF | 1       | 262                         | 159                    | 0.61                    | 6                           | 272       | 2.16                 | 6                           | 281      | 2.09              |
|                  | 2       | 284                         | 143                    | 0.50                    | 4                           | 187       | 2.09                 | 12                          | 170      | 6.59              |
|                  | 3       | 257                         | 106                    | 0.41                    | 5                           | 180       | 2.70                 | 17                          | 201      | 7.80              |
|                  | 4       | 175                         | 82                     | 0.47                    | 3                           | 169       | 1.74                 | 4                           | 205      | 1.91              |
|                  | 5       | 247                         | 139                    | 0.56                    | 7                           | 184       | 3.66                 | 3                           | 207      | 1.43              |
|                  | 6       | 99                          | 76                     | 0.77                    | 7                           | 247       | 2.76                 | 4                           | 253      | 1.56              |
|                  | 7       | 301                         | 101                    | 0.34                    | 11                          | 111       | 9.01                 | 0                           | 157      | 0                 |
|                  | 8       | 241                         | 110                    | 0.46                    | 4                           | 157       | 2.48                 | 4                           | 163      | 2.40              |
|                  | 9       | 266                         | 93                     | 0.35                    | 9                           | 157       | 5.42                 | 1                           | 187      | 0.53              |
| Control          | Sum     | 1976                        | 5005                   | -                       | 3                           | 6489      | -                    | 12                          | 9361     | -                 |
| Busulfan Only    | Sum     | 2443                        | 803                    | -                       | 40                          | 1443      | -                    | 30                          | 1594     | -                 |
| Busulfan + GCSF  | Sum     | 2132                        | 1009                   | -                       | 56                          | 1664      | -                    | 51                          | 1824     | -                 |
| Control          | Avg±SEM | 247±48                      | 626±173                | 2.40±0.15               | 0.38±0.40                   | 811±135   | 0.024±0.025          | 1.5±0.73                    | 1170±134 | 0.13±0.08         |
| Busulfan Only    | Avg±SEM | 271±58                      | 89±11                  | 0.38±0.04               | 4.44±0.78                   | 160±29    | 3.23±0.70            | 3.33±1.01                   | 177±17   | 2.01±0.76         |
| Busulfan + GCSF  | Avg±SEM | 237±22                      | 112±10                 | 0.50±0.05               | 247±48                      | 247±48    | 3.56±0.77            | 5.67±1.82                   | 203±14   | 2.70±0.89         |

**A** 5 week ♂  
C57BL/6 mice

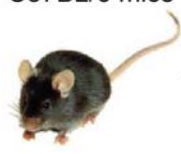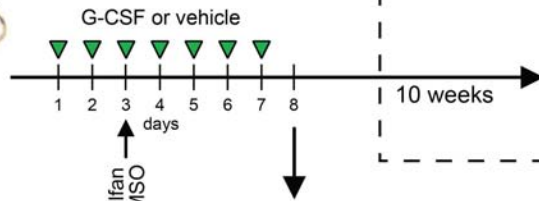

**C - Experiment 1**

Endpoints: Testis weight,  
Histology, Sperm count

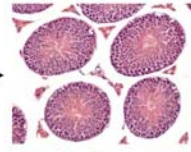

**D - Experiment 2**

Endpoints: Immunohistochemical analysis  
(PLZF, activated Caspase3, TUNEL)

**B**

| Treatment Group  | G-CSF (days 1 through 7) | Busulfan (day 3) | Experiment 1 Animal # | Experiment 2 Animal # |
|------------------|--------------------------|------------------|-----------------------|-----------------------|
| Control          | 0.1% BSA/DPBS            | DMSO             | 3                     | 8                     |
| Busulfan only    | 0.1% BSA/DPBS            | 44mg/kg in DMSO  | 3                     | 9                     |
| Busulfan + G-CSF | 50ug/kg in 0.1% BSA/DPBS | 44mg/kg in DMSO  | 4                     | 9                     |



**A** *Round cross-sections with complete spermatogenesis*

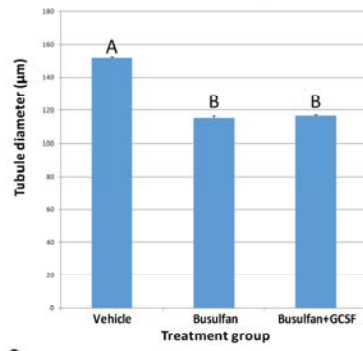

**B** *All round cross-sections*

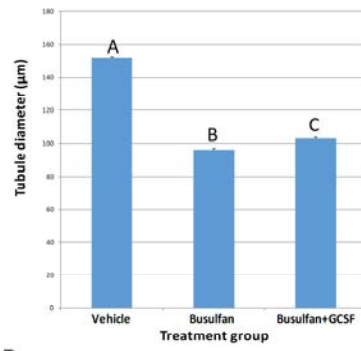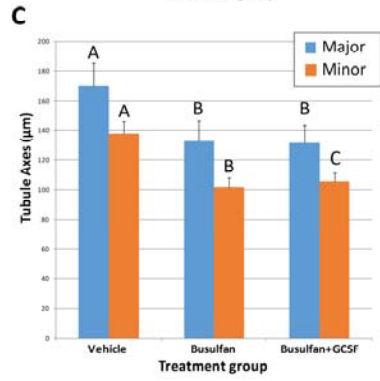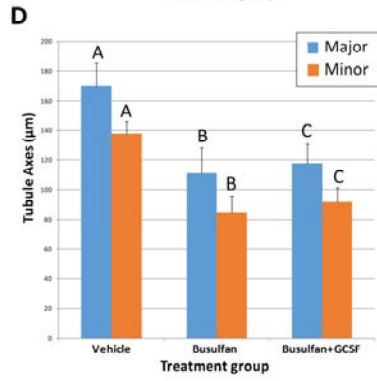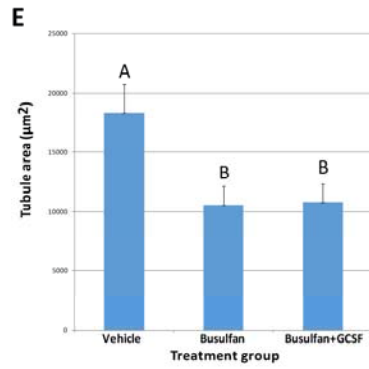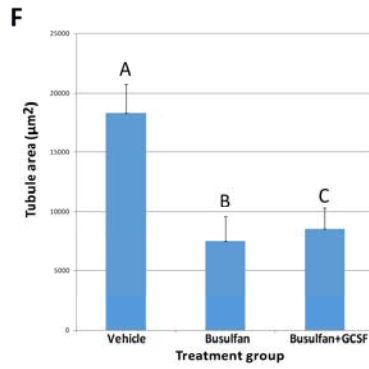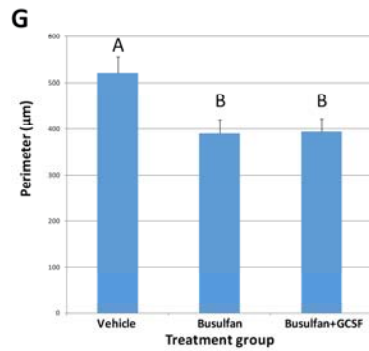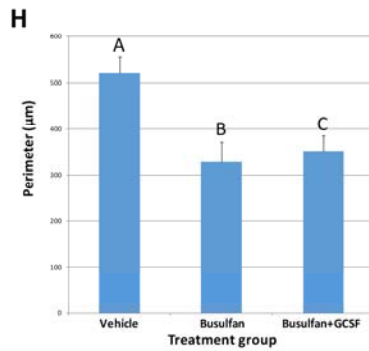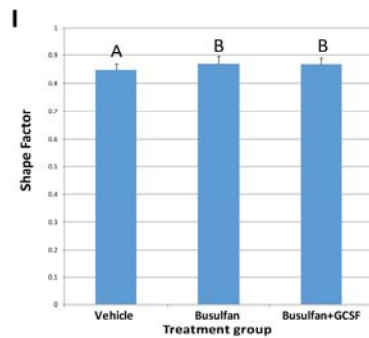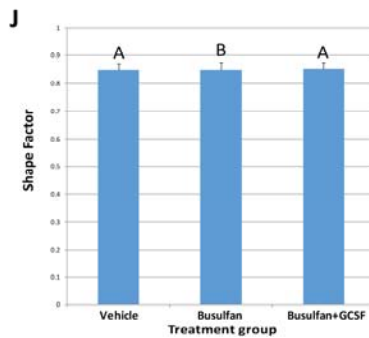

Supplement: NIHMS640780-supplement-01.pdf [file NIHMS640780-supplement-01.pdf]
